# Supplementary material for: Tunable luminescence and energy transfer properties of Ca5(PO4)2SiO4:Ce3+/Tb3+/Mn2+ phosphors
Source: Royal Society of Chemistry journal article supplement (doi:10.1039/c3tc00039g), 2013-01-01
Supplement: c3tc00039g.pdf [file c3tc00039g.pdf]

## Supporting information

**Title:** Tunable luminescence and energy transfer properties in  $\text{Ca}_5(\text{PO}_4)_2\text{SiO}_4$ :  $\text{Ce}^{3+}/\text{Tb}^{3+}/\text{Mn}^{2+}$  phosphors

**Author(s):** Dongling Geng,<sup>a,b</sup> Mengmeng Shang,<sup>a,b</sup> Yang Zhang,<sup>a,b</sup> Hongzhou Lian,<sup>a</sup> Ziyong Cheng<sup>a</sup> and Jun Lin<sup>a,\*</sup>

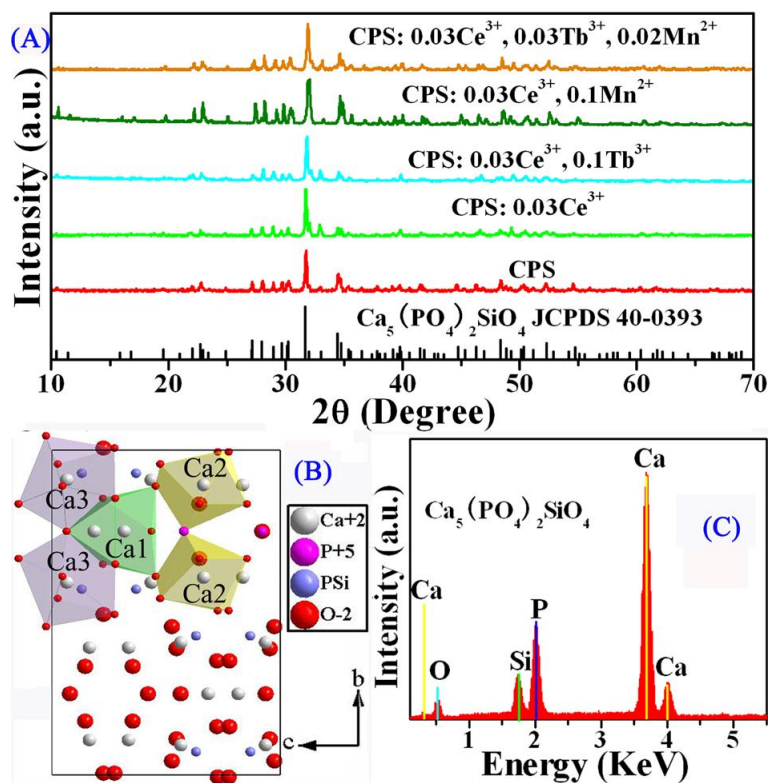

**Fig. S1** (A) The representative XRD patterns for CPS and  $\text{Ce}^{3+}/\text{Tb}^{3+}/\text{Mn}^{2+}$  doped CPS samples annealed at 1350 °C for 3 h; (B) the crystal structure along the *a*-axis direction and (C) the EDX spectrum of CPS.

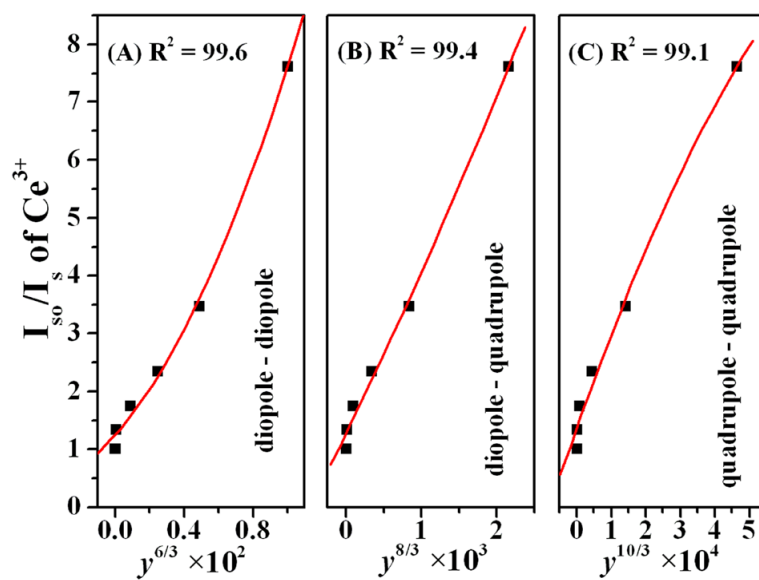

**Fig. S2** Dependence of  $I_{so}/I_s$  of  $Ce^{3+}$  on (A)  $y^{6/3}$  (B)  $y^{8/3}$  (C)  $y^{10/3}$  in the CPS:  $0.03Ce^{3+}$ ,  $yTb^{3+}$  samples ( $y = 0 - 0.10$ ).

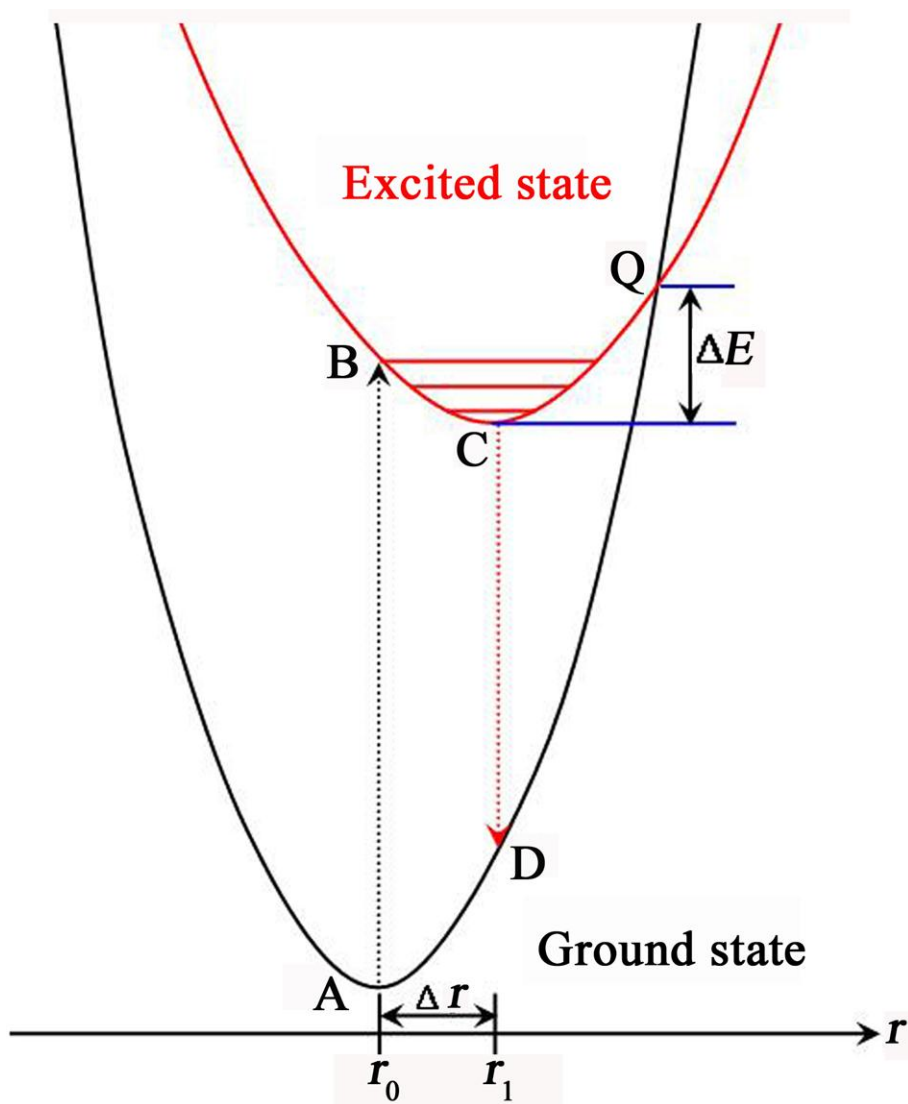

**Fig. S3** The schematic of configurational coordinate diagram for general mechanism of temperature-dependent emission of phosphor.

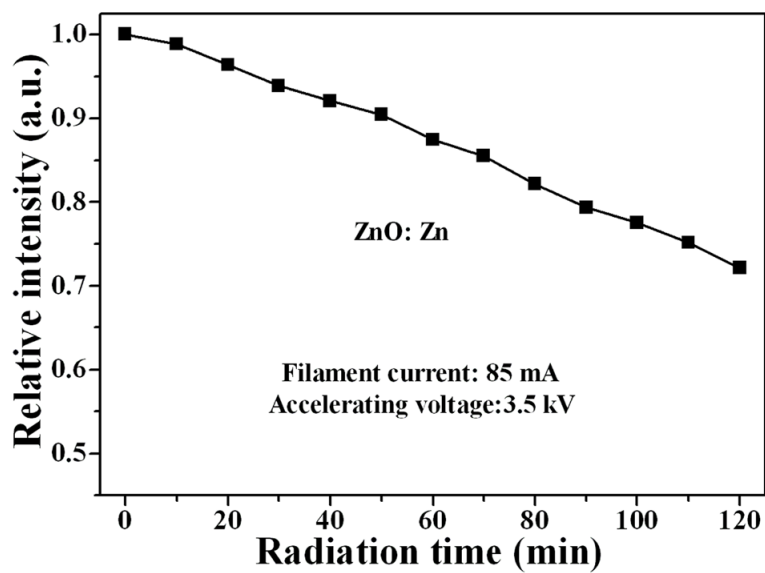

**Fig. S4** The dependence CL intensity of ZnO: Zn phosphor on radiation time. (Accelerating voltage = 3.5 kV, filament current = 85 mA)

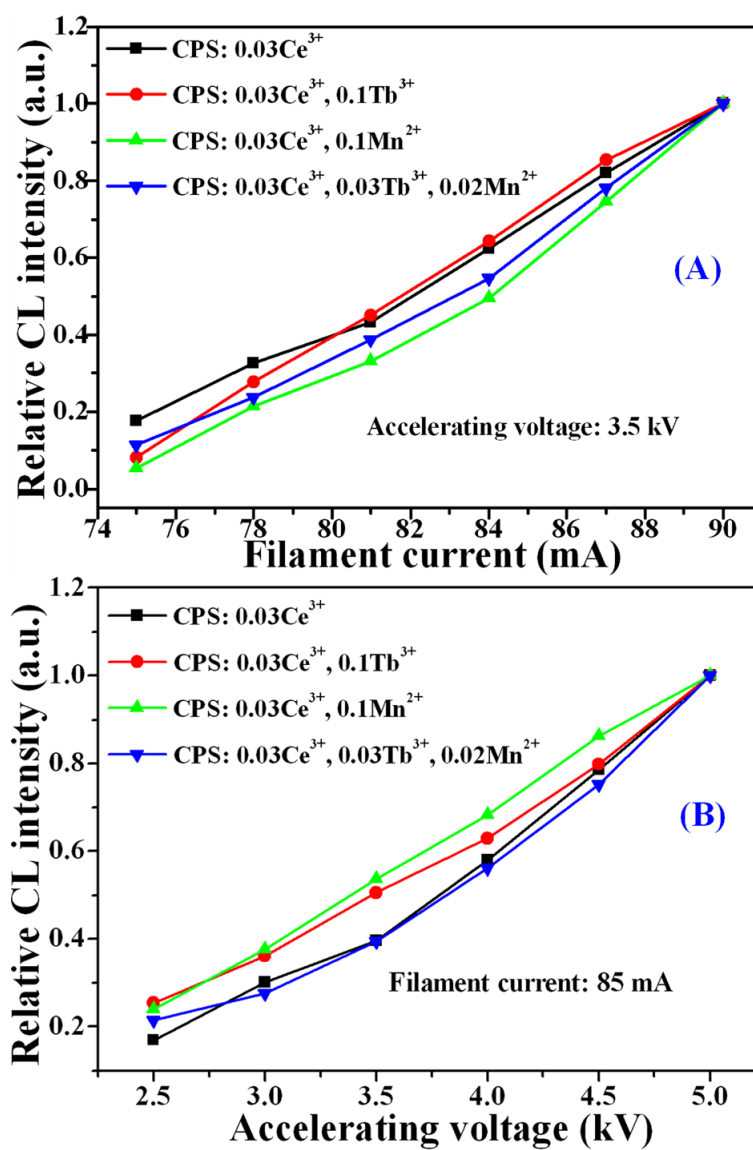

**Fig. S5** CL intensities of CPS: 0.03Ce<sup>3+</sup>, yTb<sup>3+</sup>, zMn<sup>2+</sup> samples as a function of filament current (A) and accelerating voltage (B).

**Table S1** Cell parameters of CPS and Ce<sup>3+</sup>/Tb<sup>3+</sup>/Mn<sup>2+</sup>-doped CPS samples.

| Sample \ Cell parameter                                                 | <i>a</i> (Å) | <i>b</i> (Å) | <i>c</i> (Å) | <i>V</i> (Å <sup>3</sup> ) |
|-------------------------------------------------------------------------|--------------|--------------|--------------|----------------------------|
| CPS                                                                     | 6.7241       | 15.4899      | 10.0975      | 1051.71                    |
| CPS: 0.01Ce <sup>3+</sup>                                               | 6.7246       | 15.4898      | 10.0984      | 1051.88                    |
| CPS: 0.05Ce <sup>3+</sup>                                               | 6.7262       | 15.4908      | 10.0988      | 1052.24                    |
| CPS: 0.03 Ce <sup>3+</sup> , 0.01Tb <sup>3+</sup>                       | 6.7252       | 15.4896      | 10.0969      | 1051.80                    |
| CPS: 0.03 Ce <sup>3+</sup> , 0.05Tb <sup>3+</sup>                       | 6.7261       | 15.4895      | 10.0954      | 1051.78                    |
| CPS: 0.03Ce <sup>3+</sup> , 0.03Mn <sup>2+</sup>                        | 6.7259       | 15.4893      | 10.0936      | 1051.55                    |
| CPS: 0.03Ce <sup>3+</sup> , 0.07Mn <sup>2+</sup>                        | 6.7266       | 15.4892      | 10.0891      | 1051.18                    |
| CPS: 0.03Ce <sup>3+</sup> , 0.1Mn <sup>2+</sup>                         | 6.7266       | 15.4885      | 10.0885      | 1051.07                    |
| CPS: 0.03Ce <sup>3+</sup> , 0.01Tb <sup>3+</sup> , 0.05Mn <sup>2+</sup> | 6.7255       | 15.4889      | 10.0918      | 1051.27                    |
| CPS: 0.03Ce <sup>3+</sup> , 0.02Tb <sup>3+</sup> , 0.05Mn <sup>2+</sup> | 6.7257       | 15.4876      | 10.0878      | 1050.79                    |
